# Supplementary material for: A novel population of extracellular vesicles smaller than exosomes promotes cell proliferation
Source: PubMed Central journal article supplement (PMC6694590; doi:10.1186/s12964-019-0401-z), 2019-08-15

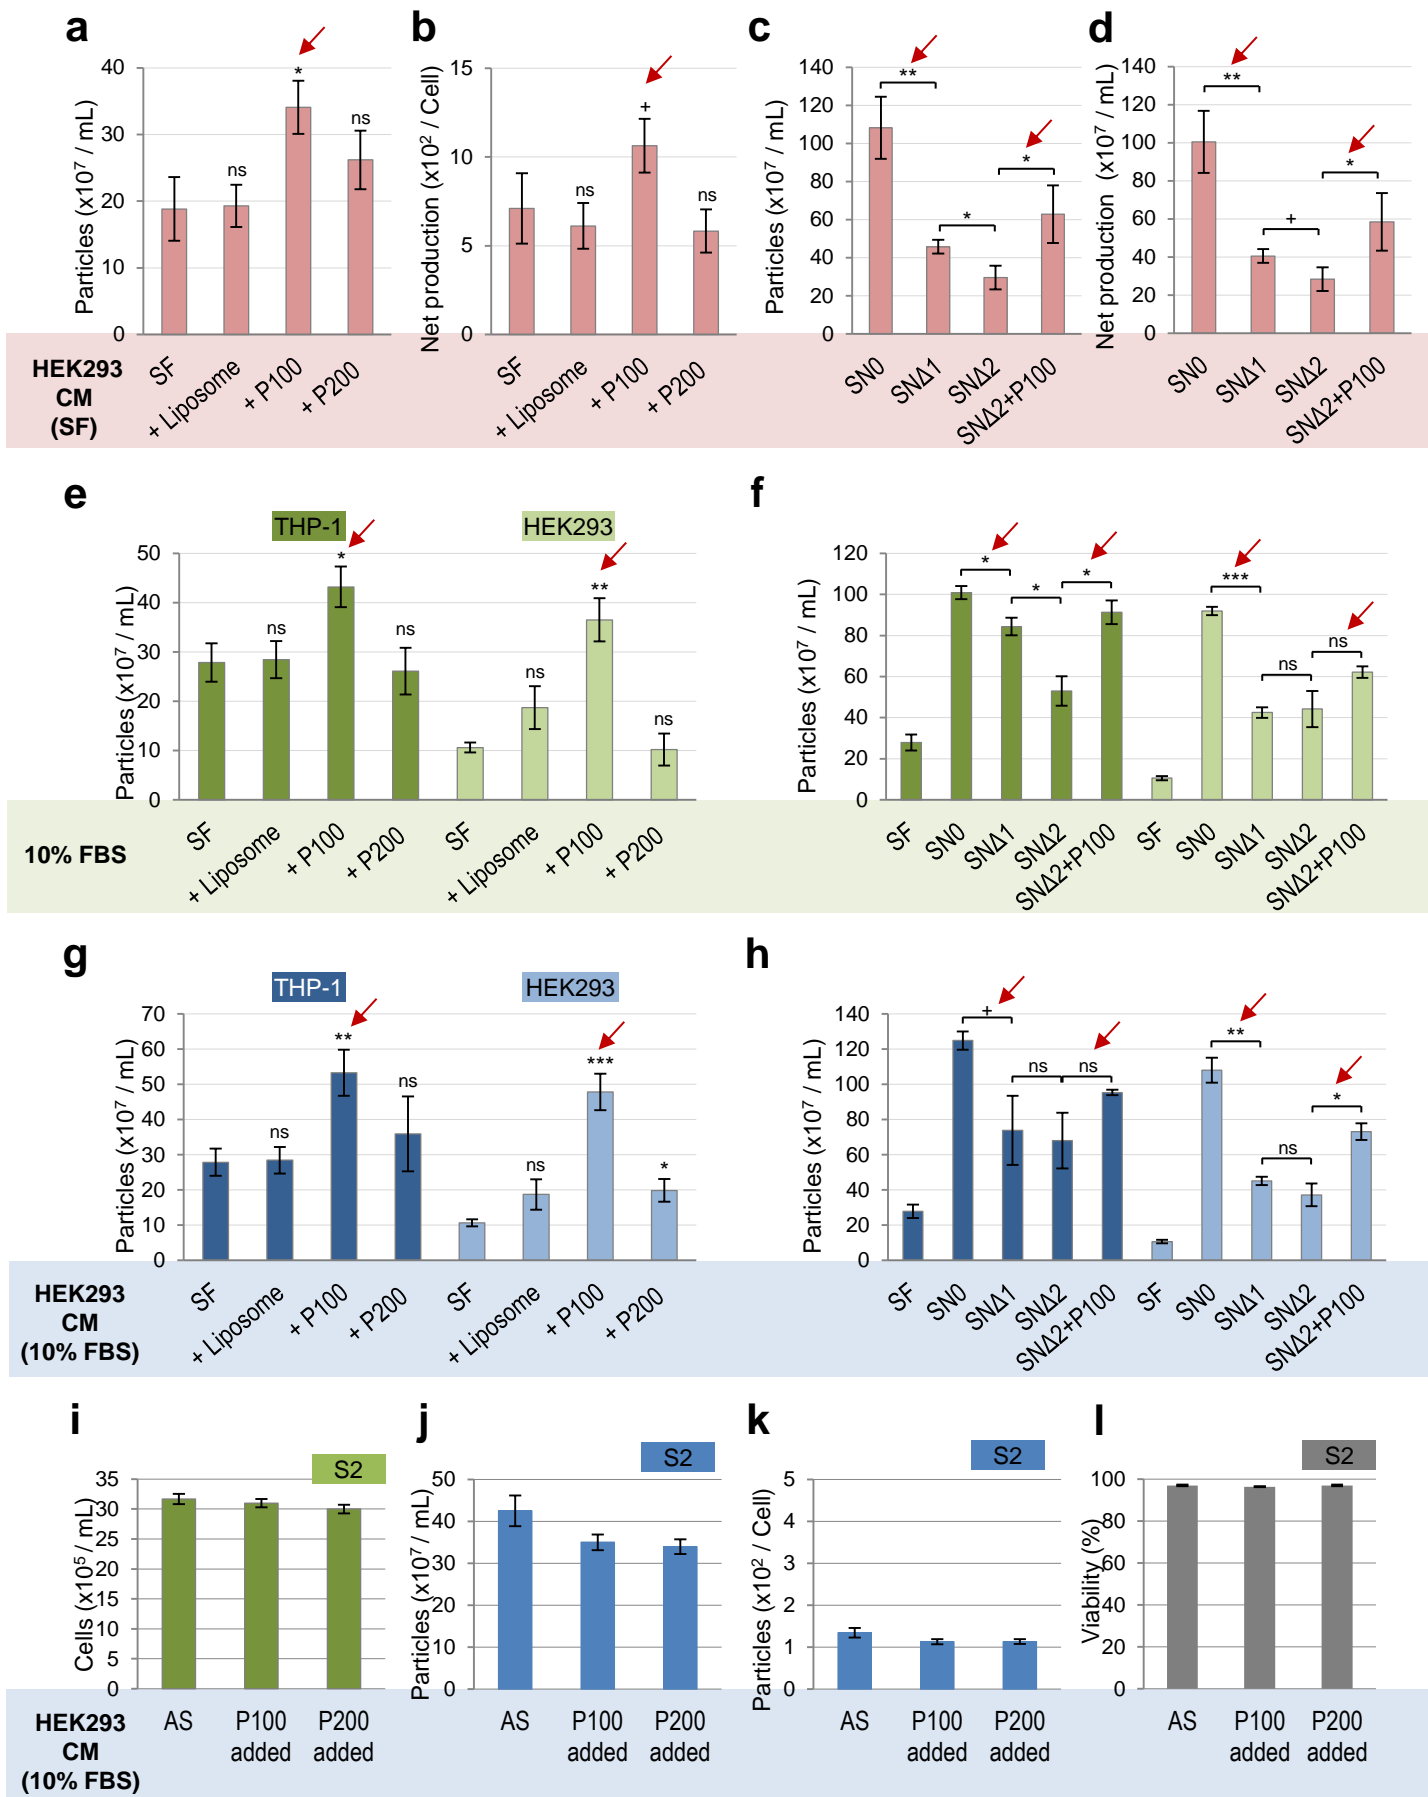

Supplement: 12964_2019_401_MOESM3_ESM.pdf [file 12964_2019_401_MOESM3_ESM.pdf]
